# Supplementary material for: Prenyleudesmanes and A Hexanorlanostane from the Roots of Lonicera macranthoides
Source: PubMed Central journal article supplement (PMC6930473; doi:10.3390/molecules24234276), 2019-11-23
Supplement: molecules-24-04276-s001.pdf [file molecules-24-04276-s001.pdf]

## Supplementary data

### Prenyleudesmanes and a hexanorlanostane from the roots of

#### *Lonicera macranthoides*

#### Authors

Hui Lyu<sup>1,2,†</sup>, Wenjuan Liu<sup>3,†</sup>, Bai Bai<sup>1</sup>, Yu Shan<sup>1</sup>, Christian Paetz<sup>2</sup>, Xu Feng<sup>1,\*</sup>, Yu Chen<sup>1,\*</sup>

#### Affiliations

<sup>1</sup> Jiangsu Key Laboratory for the Research and Utilization of Plant Resources, The Jiangsu Provincial Platform for Conservation and Utilization of Agricultural Germplasm, Institute of Botany, Jiangsu Province and Chinese Academy of Sciences, Nanjing, China

<sup>2</sup> Max Planck Institute for Chemical Ecology, Jena, Germany

<sup>3</sup> Naval Compound Community Health Care Station, Beijing, China

\* Correspondence: [fengxucnbg@mail.cnbg.net](mailto:fengxucnbg@mail.cnbg.net); Tel.: +86-25-84347158,  
yuchen1007@hotmail.com; Tel.: +86-25-84347116

† These two authors contributed equally to this work.

## Contents

| No. | Content                                                                                                                      | Page |
|-----|------------------------------------------------------------------------------------------------------------------------------|------|
| 1   | <b>Figure S1.</b> HR-ESI-MS spectrum of compound <b>1</b> .                                                                  | S4   |
| 2   | <b>Figure S2.</b> UV spectrum of compound <b>1</b> .                                                                         | S4   |
| 3   | <b>Figure S3.</b> <sup>1</sup> H-NMR spectrum (500 MHz, CDCl <sub>3</sub> ) of compound <b>1</b> .                           | S5   |
| 4   | <b>Figure S4.</b> <sup>13</sup> C-NMR spectrum (125 MHz, CDCl <sub>3</sub> ) of compound <b>1</b> .                          | S5   |
| 5   | <b>Figure S5.</b> DEPT spectrum (125 MHz, CDCl <sub>3</sub> ) of compound <b>1</b> .                                         | S6   |
| 6   | <b>Figure S6.</b> HSQC spectrum (500 MHz, CDCl <sub>3</sub> ) of compound <b>1</b> .                                         | S6   |
| 7   | <b>Figure S7.</b> HMBC spectrum (500 MHz, CDCl <sub>3</sub> ) of compound <b>1</b> .                                         | S7   |
| 8   | <b>Figure S8.</b> <sup>1</sup> H - <sup>1</sup> H COSY spectrum (500 MHz, CDCl <sub>3</sub> ) of compound <b>1</b> .         | S7   |
| 9   | <b>Figure S9.</b> ROESY spectrum (500 MHz, CDCl <sub>3</sub> ) of compound <b>1</b> .                                        | S8   |
| 10  | <b>Figure S10.</b> SELTOCSY spectrum (500 MHz, transmitter frequency at 1.79 ppm, CDCl <sub>3</sub> ) of compound <b>1</b> . | S8   |
| 11  | <b>Figure S11.</b> SELTOCSY spectrum (500 MHz, transmitter frequency at 1.86 ppm, CDCl <sub>3</sub> ) of compound <b>1</b> . | S9   |
| 12  | <b>Figure S12.</b> SELTOCSY spectrum (500 MHz, transmitter frequency at 5.14 ppm, CDCl <sub>3</sub> ) of compound <b>1</b> . | S9   |
| 13  | <b>Figure S13.</b> HR-ESI-MS spectrum of compound <b>2</b> .                                                                 | S10  |
| 14  | <b>Figure S14.</b> UV spectrum of compound <b>2</b> .                                                                        | S10  |
| 15  | <b>Figure S15.</b> <sup>1</sup> H-NMR spectrum (500 MHz, CDCl <sub>3</sub> ) of compound <b>2</b> .                          | S11  |
| 16  | <b>Figure S16.</b> <sup>13</sup> C-NMR spectrum (125 MHz, CDCl <sub>3</sub> ) of compound <b>2</b> .                         | S11  |
| 17  | <b>Figure S17.</b> DEPT spectrum (125 MHz, CDCl <sub>3</sub> ) of compound <b>2</b> .                                        | S12  |
| 18  | <b>Figure S18.</b> HSQC spectrum (500 MHz, CDCl <sub>3</sub> ) of compound <b>2</b> .                                        | S12  |
| 19  | <b>Figure S19.</b> HMBC spectrum (500 MHz, CDCl <sub>3</sub> ) of compound <b>2</b> .                                        | S13  |
| 20  | <b>Figure S20.</b> <sup>1</sup> H- <sup>1</sup> H COSY spectrum (500 MHz, CDCl <sub>3</sub> ) of compound <b>2</b> .         | S13  |
| 21  | <b>Figure S21.</b> ROESY spectrum (500 MHz, CDCl <sub>3</sub> ) of compound <b>2</b> .                                       | S14  |
| 22  | <b>Figure S22.</b> SELTOCSY spectrum (500 MHz, transmitter frequency at 4.28 ppm, CDCl <sub>3</sub> ) of compound <b>2</b> . | S14  |
| 23  | <b>Figure S23.</b> SELTOCSY spectrum (500 MHz, transmitter                                                                   | S15  |

|    |                                                                                                                                              |     |
|----|----------------------------------------------------------------------------------------------------------------------------------------------|-----|
|    | frequency at 1.88 ppm, CDCl <sub>3</sub> ) of compound <b>2</b> .                                                                            |     |
| 24 | <b>Figure S24.</b> SELTOCSY spectrum (500 MHz, transmitter frequency at 5.13 ppm, CDCl <sub>3</sub> ) of compound <b>2</b> .                 | S15 |
| 25 | <b>Figure S25.</b> HR-ESI-MS spectrum of compound <b>3</b> .                                                                                 | S16 |
| 26 | <b>Figure S26.</b> UV spectrum of compound <b>3</b> .                                                                                        | S16 |
| 27 | <b>Figure S27.</b> <sup>1</sup> H-NMR spectrum (500 MHz, CDCl <sub>3</sub> :CD <sub>3</sub> OD =1:1) of compound <b>3</b> .                  | S17 |
| 28 | <b>Figure S28.</b> <sup>13</sup> C-NMR spectrum (125 MHz, CDCl <sub>3</sub> :CD <sub>3</sub> OD =1:1) of compound <b>3</b> .                 | S17 |
| 29 | <b>Figure S29.</b> DEPT spectrum (125 MHz, CDCl <sub>3</sub> :CD <sub>3</sub> OD=1:1) of compound <b>3</b> .                                 | S18 |
| 30 | <b>Figure S30.</b> HSQC spectrum (500 MHz, CDCl <sub>3</sub> :CD <sub>3</sub> OD=1:1) of compound <b>3</b> .                                 | S18 |
| 31 | <b>Figure S31.</b> HMBC spectrum (500 MHz, CDCl <sub>3</sub> :CD <sub>3</sub> OD=1:1) of compound <b>3</b> .                                 | S19 |
| 32 | <b>Figure S32.</b> <sup>1</sup> H- <sup>1</sup> H COSY spectrum (500 MHz, CDCl <sub>3</sub> :CD <sub>3</sub> OD =1:1) of compound <b>3</b> . | S19 |
| 33 | <b>Figure S33.</b> ROESY spectrum (500 MHz, CDCl <sub>3</sub> :CD <sub>3</sub> OD=1:1) of compound <b>3</b> .                                | S20 |
| 34 | <b>Figure S34.</b> SELTOCSY spectrum (500 MHz, transmitter frequency at 3.57 ppm, CDCl <sub>3</sub> ) of compound <b>3</b> .                 | S20 |
| 35 | <b>Figure S35.</b> SELTOCSY spectrum (500 MHz, transmitter frequency at 5.49 ppm, CDCl <sub>3</sub> ) of compound <b>3</b> .                 | S21 |
| 36 | <b>Figure S36.</b> SELTOCSY spectrum (500 MHz, transmitter frequency at 6.31 ppm, CDCl <sub>3</sub> ) of compound <b>3</b> .                 | S21 |
| 37 | <b>Figure S37.</b> SELTOCSY spectrum (500 MHz, transmitter frequency at 3.62 ppm, CDCl <sub>3</sub> ) of compound <b>3</b> .                 | S22 |

---

### Qualitative Analysis Report

Data Filename: LH-4216-LMB-15.d      Sample Name: LH-4216  
Sample Type: Sample      Position: P2-03  
Instrument Name: Instrument 1      User Name:  
Acq Method: LH LML.m      Acquired Time: 4/14/2018 10:35:59 AM  
IRM Calibration Status: Success      DA Method: YINMIN.m  
Comment:

Sample Group:      Info.

#### User Spectra

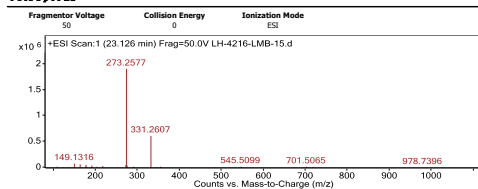

| m/z      | z | Abund      |
|----------|---|------------|
| 149.1316 | 1 | 61139.50   |
| 163.1475 | 1 | 71275.75   |
| 177.1631 | 1 | 56453.14   |
| 271.2417 | 1 | 61072.92   |
| 273.2577 | 1 | 1908992.13 |
| 273.3995 | 1 | 119781.39  |
| 273.4571 | 2 | 71117.74   |
| 274.2607 | 1 | 484325.53  |
| 331.2607 | 1 | 616329.88  |
| 332.2648 | 1 | 126626.41  |

Figure S1.

HR-ESI-MS spectrum of compound 1.

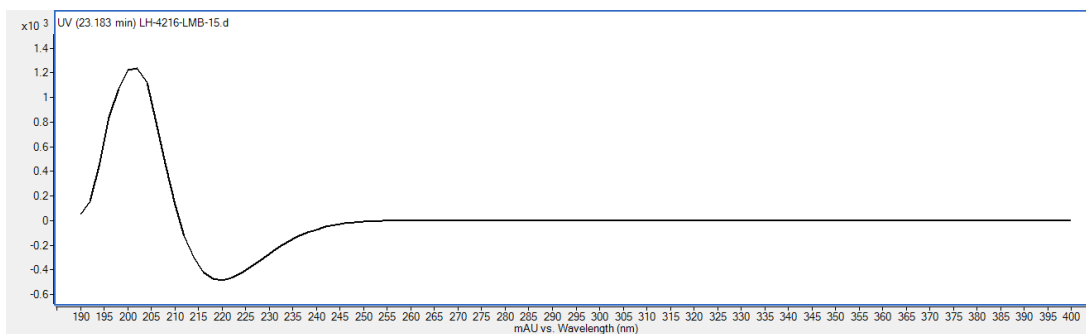

Figure S2.

UV spectrum of compound 1.

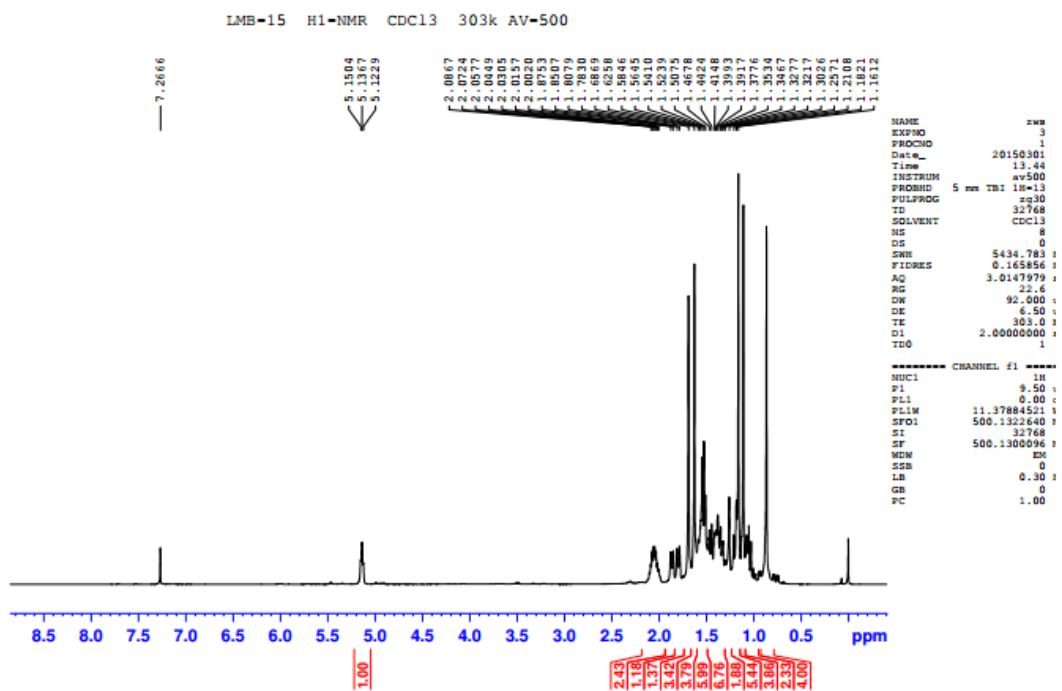

Figure S3.  $^1\text{H}$ -NMR spectrum (500 MHz,  $\text{CDCl}_3$ ) of compound **1**.

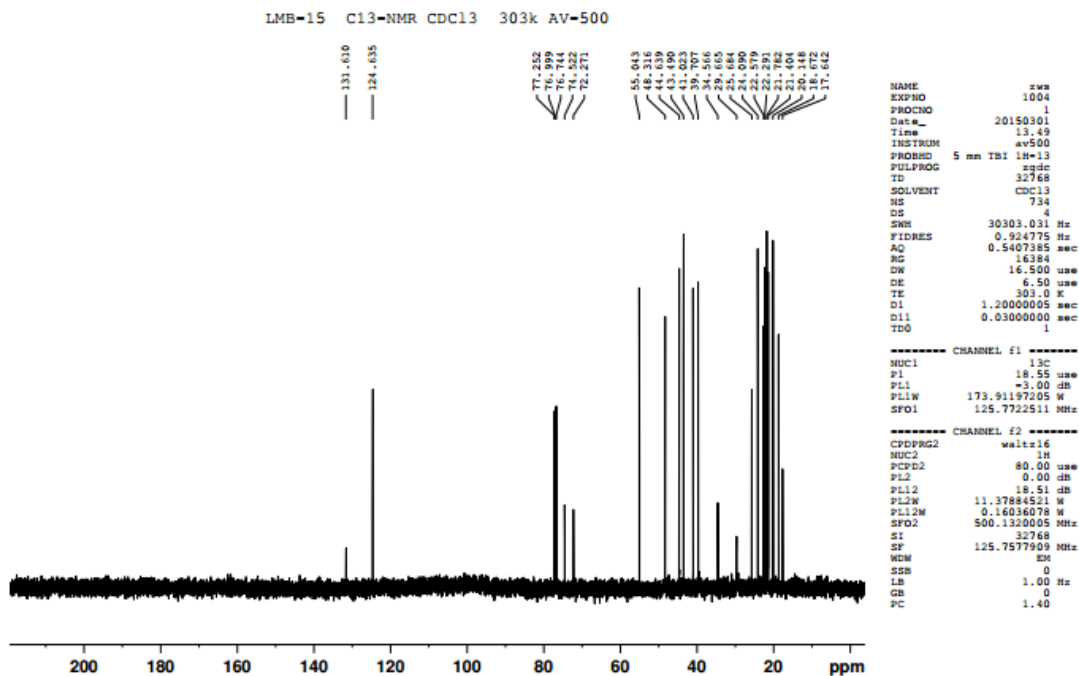

Figure S4.  $^{13}\text{C}$ -NMR spectrum (125 MHz,  $\text{CDCl}_3$ ) of compound **1**.

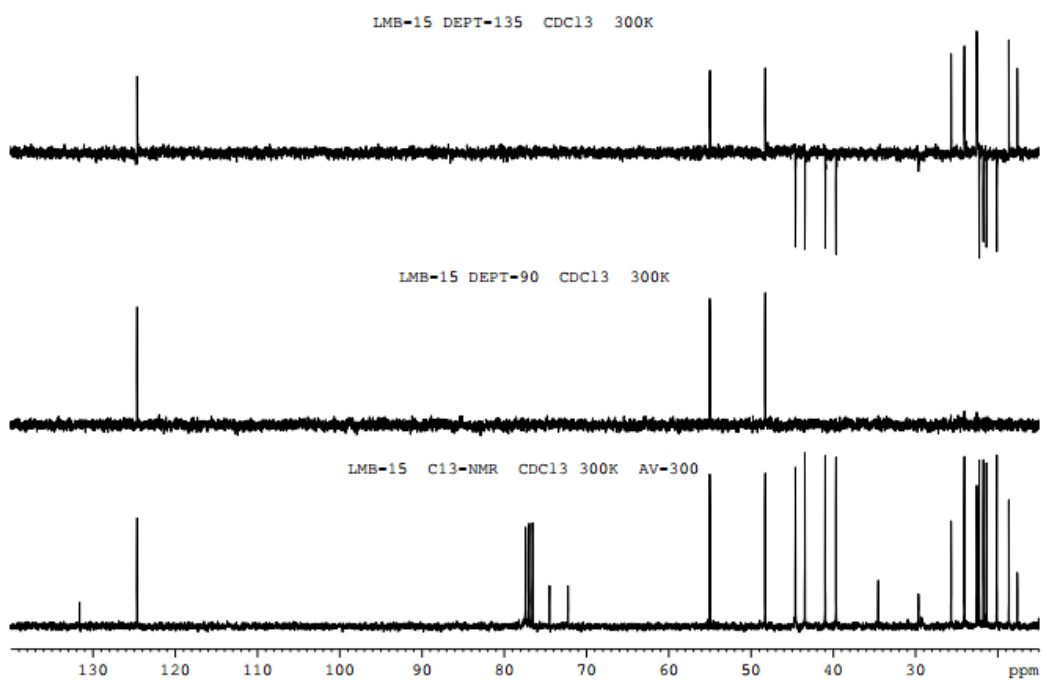

Figure S5. DEPT spectrum (125 MHz, CDCl<sub>3</sub>) of compound 1.

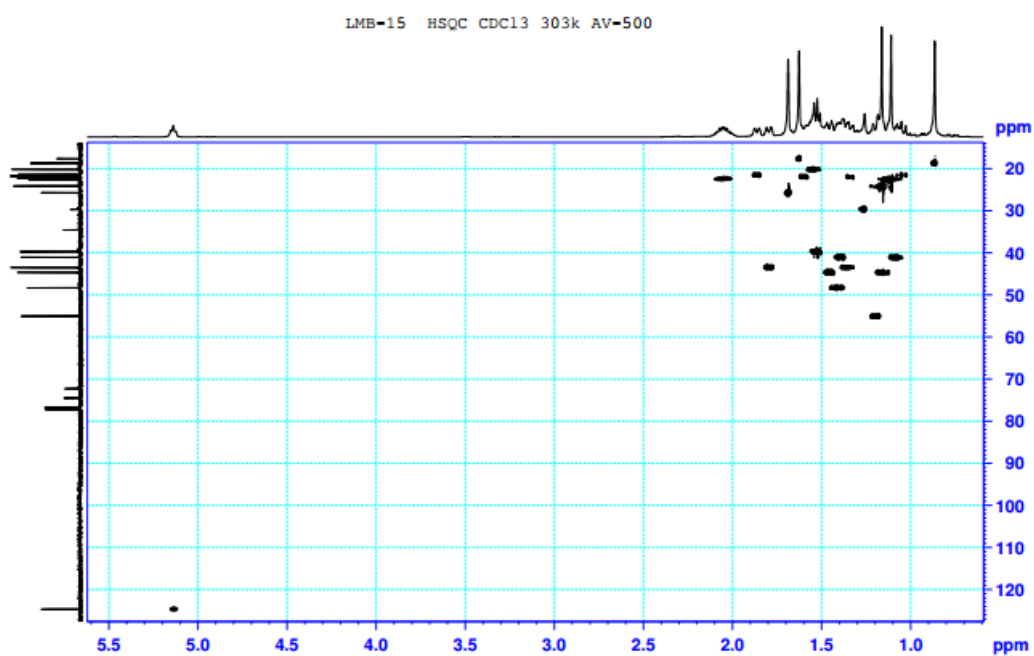

Figure S6. HSQC spectrum (500 MHz, CDCl<sub>3</sub>) of compound 1.

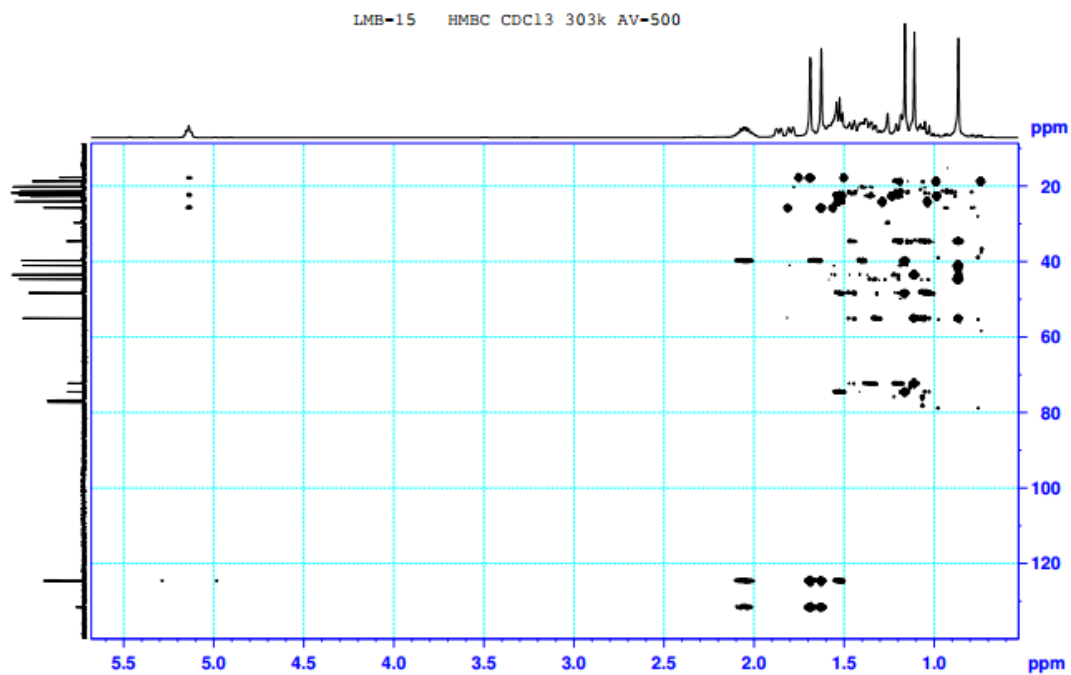

Figure S7. HMBC spectrum (500 MHz,  $\text{CDCl}_3$ ) of compound **1**.

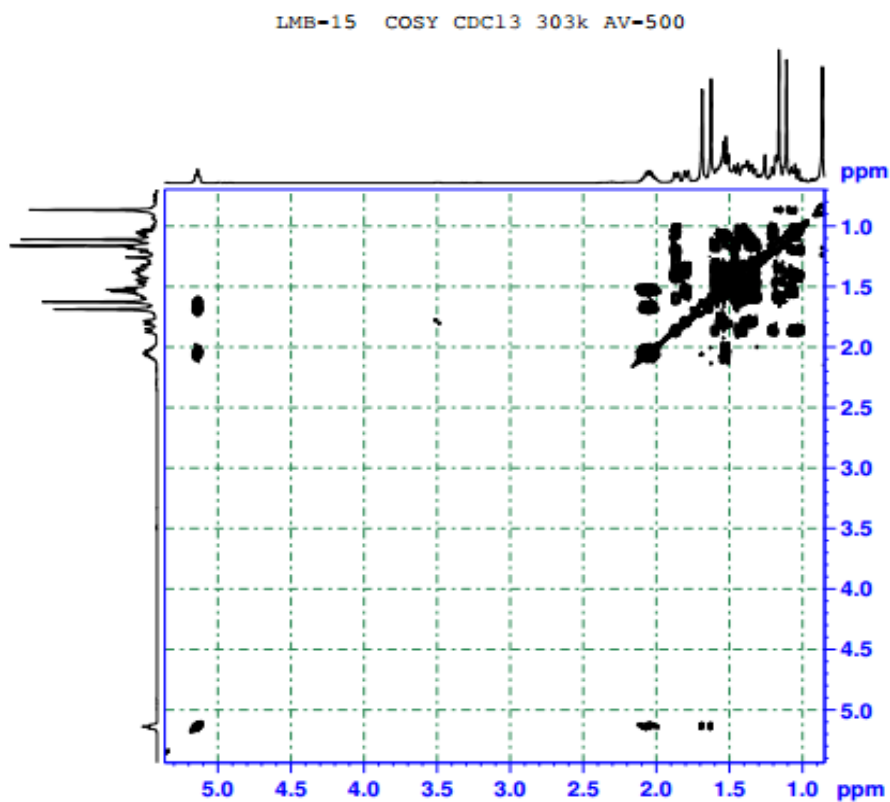

Figure S8.  $^1\text{H}$ - $^1\text{H}$  COSY spectrum (500 MHz,  $\text{CDCl}_3$ ) of compound **1**.

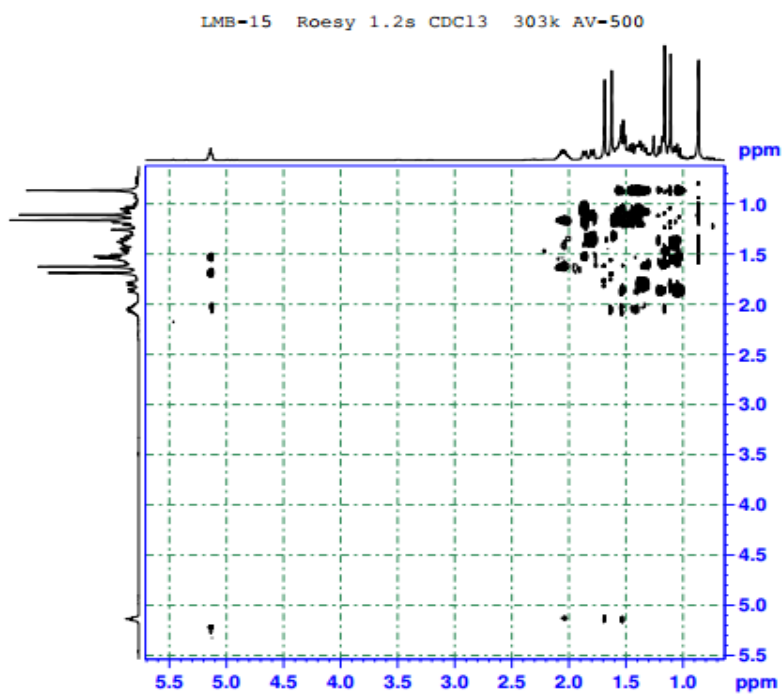

**Figure S9.** ROESY spectrum (500 MHz, CDCl<sub>3</sub>) of compound **1**.

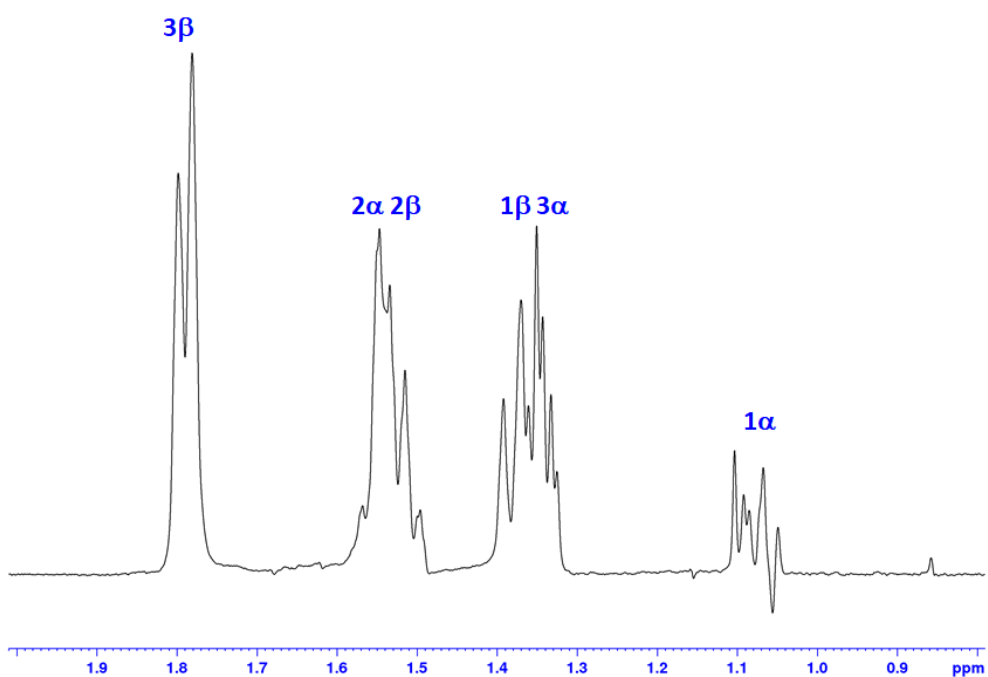

**Figure S10.** SELTOCSY spectrum (500 MHz, transmitter frequency at 1.79 ppm, 10 Hz width, 120 ms mix time, CDCl<sub>3</sub>) of compound **1**.



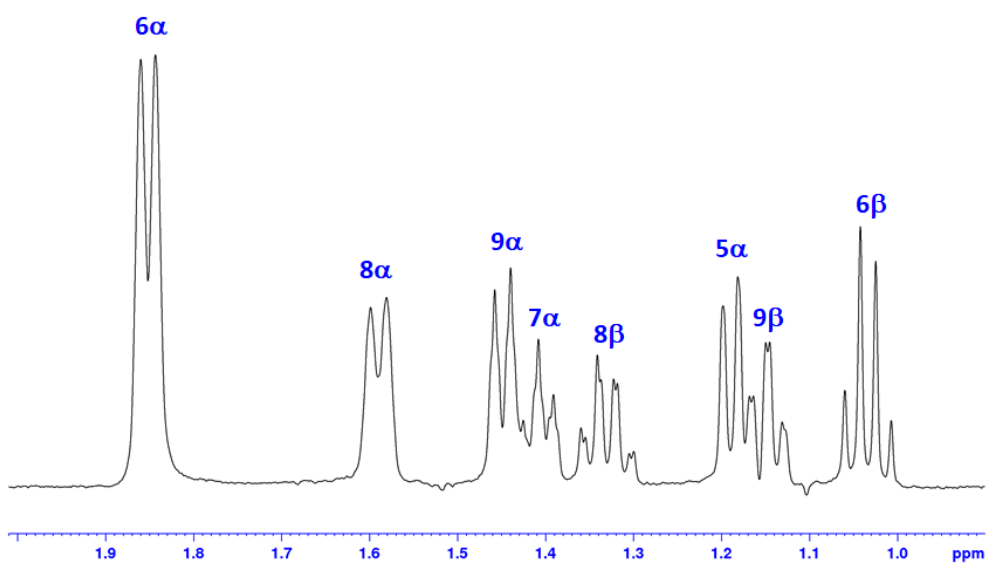

**Figure S11.** SELTOCSY spectrum (500 MHz, transmitter frequency at 1.86 ppm, 10 Hz width, 120 ms mix time,  $\text{CDCl}_3$ ) of compound **1**.

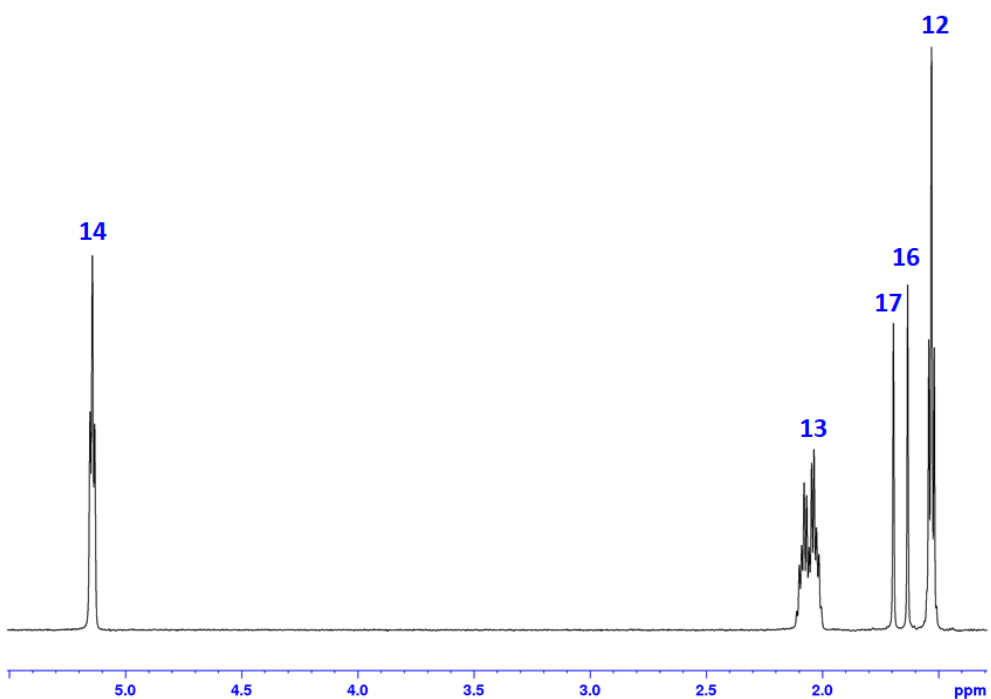

**Figure S12.** SELTOCSY spectrum (500 MHz, transmitter frequency at 5.14 ppm, 10 Hz width, 120 ms mix time,  $\text{CDCl}_3$ ) of compound **1**.

### Qualitative Analysis Report

Data Filename: LH-4214-LMR-9.d      Sample Name: LH-4214  
Sample Type: Sample      Position: F2-D1  
Instrument Name: Instrument 1      User Name:  
Acq Method: LH.LML.m      Acquired Time: 4/14/2018 8:54:10 AM  
IRM Calibration Status: Success      DA Method: YINMIN.m  
Comment:

Sample Group:      Info:

#### User Spectra

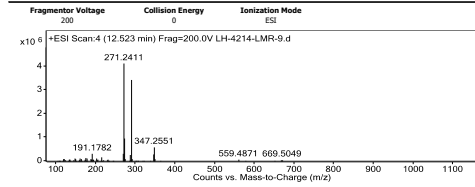

| m/z      | z | Abund      |
|----------|---|------------|
| 191.1782 | 1 | 313494.78  |
| 269.2259 | 1 | 320340.78  |
| 271.2411 | 2 | 4123874.75 |
| 271.3824 | 1 | 277907.56  |
| 272.2442 | 2 | 973332.25  |
| 387.2361 | 1 | 249770.91  |
| 389.2518 | 1 | 3439059.5  |
| 390.2548 | 1 | 816644.81  |
| 345.2397 | 1 | 285323.72  |
| 347.2551 | 1 | 593994.56  |

Figure S13.

HR-ESI-MS spectrum of compound 2.

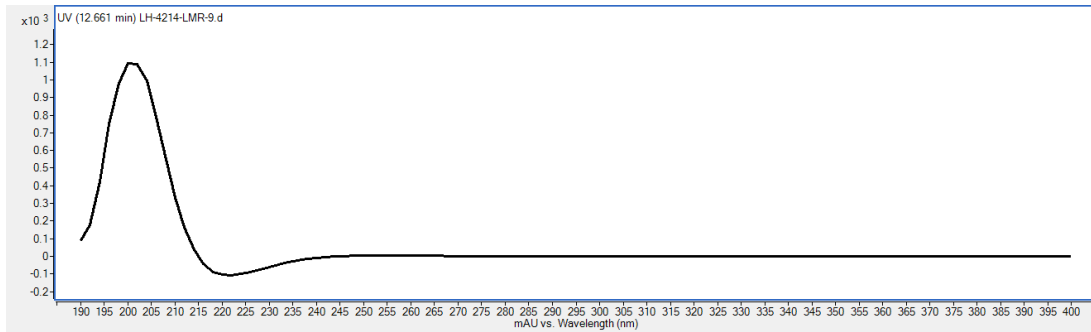

Figure S14.

UV spectrum of compound 2.

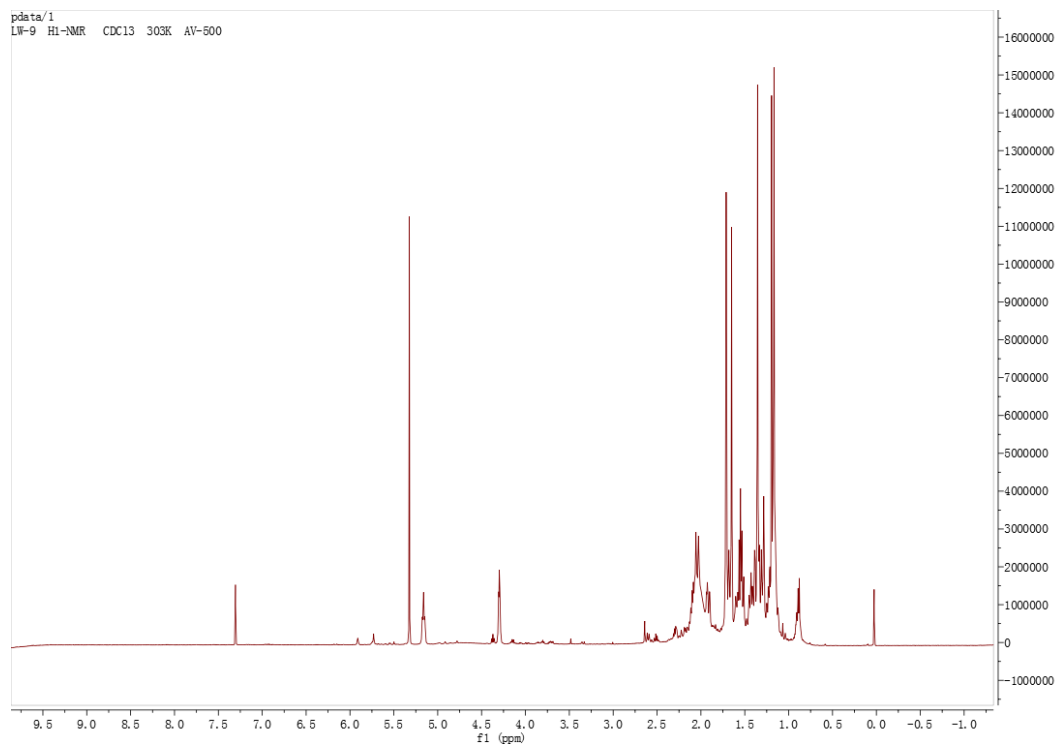

**Figure S15.**  $^1\text{H}$ -NMR spectrum (500 MHz,  $\text{CDCl}_3$ ) of compound **2**.

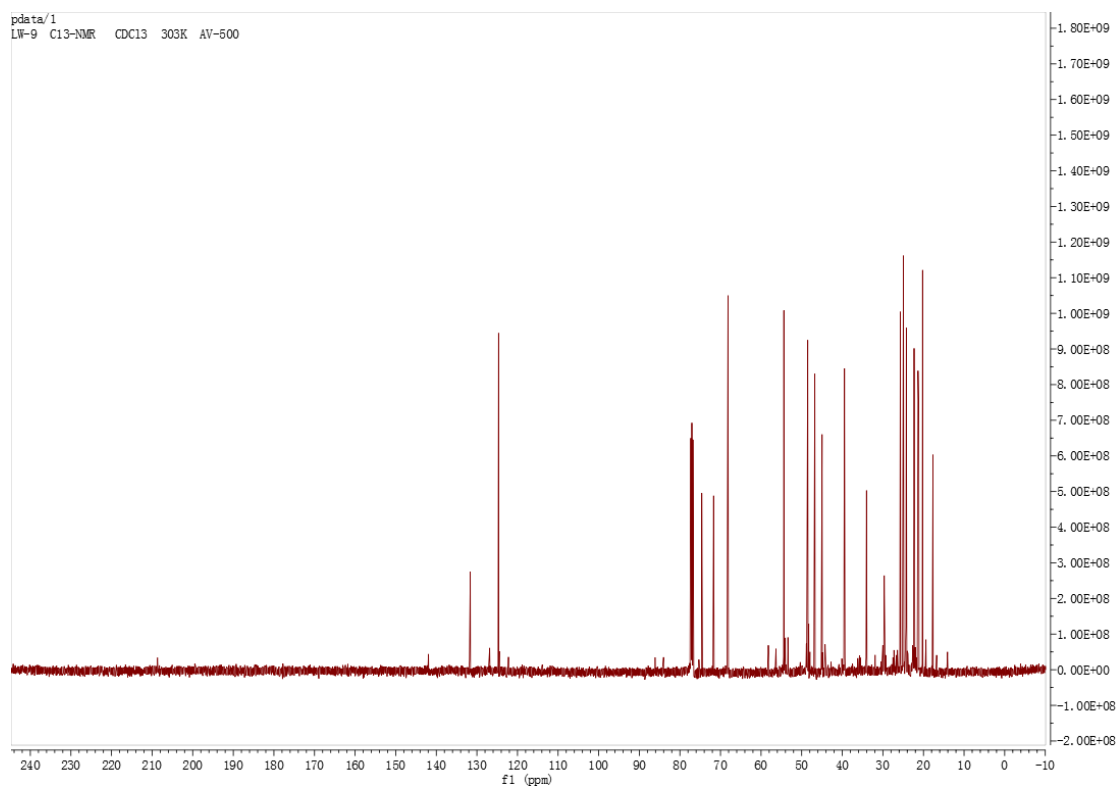

**Figure S16.**  $^{13}\text{C}$ -NMR spectrum (125 MHz,  $\text{CDCl}_3$ ) of compound **2**.

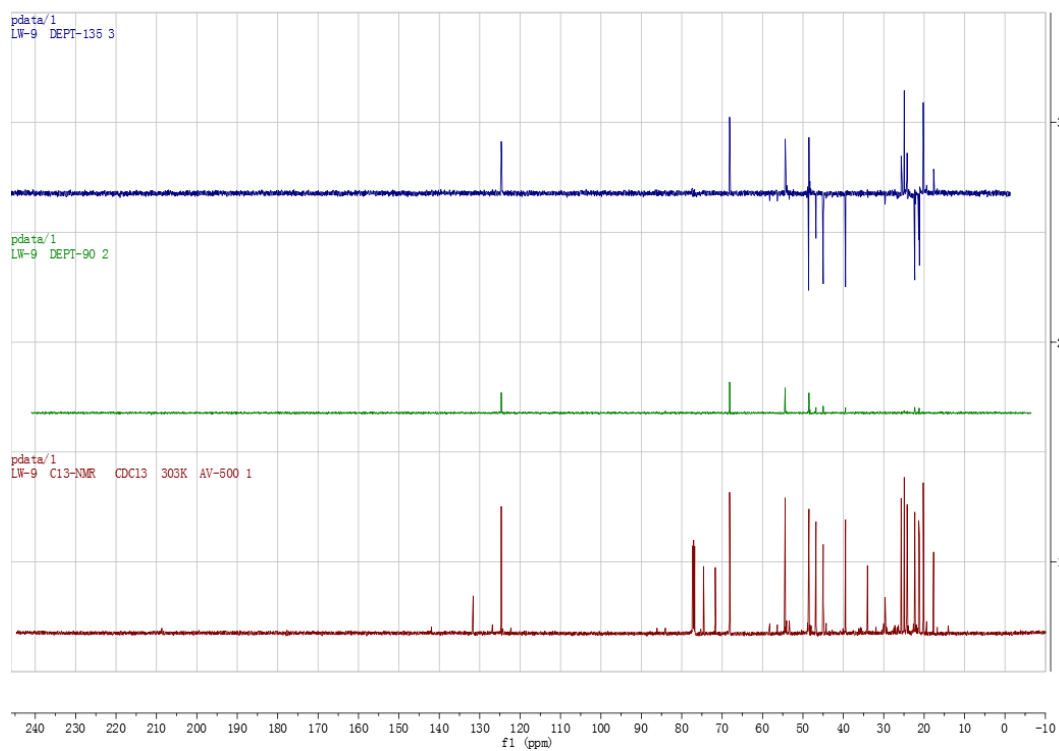

**Figure S17.** DEPT spectrum (125 MHz,  $\text{CDCl}_3$ ) of compound **2**.

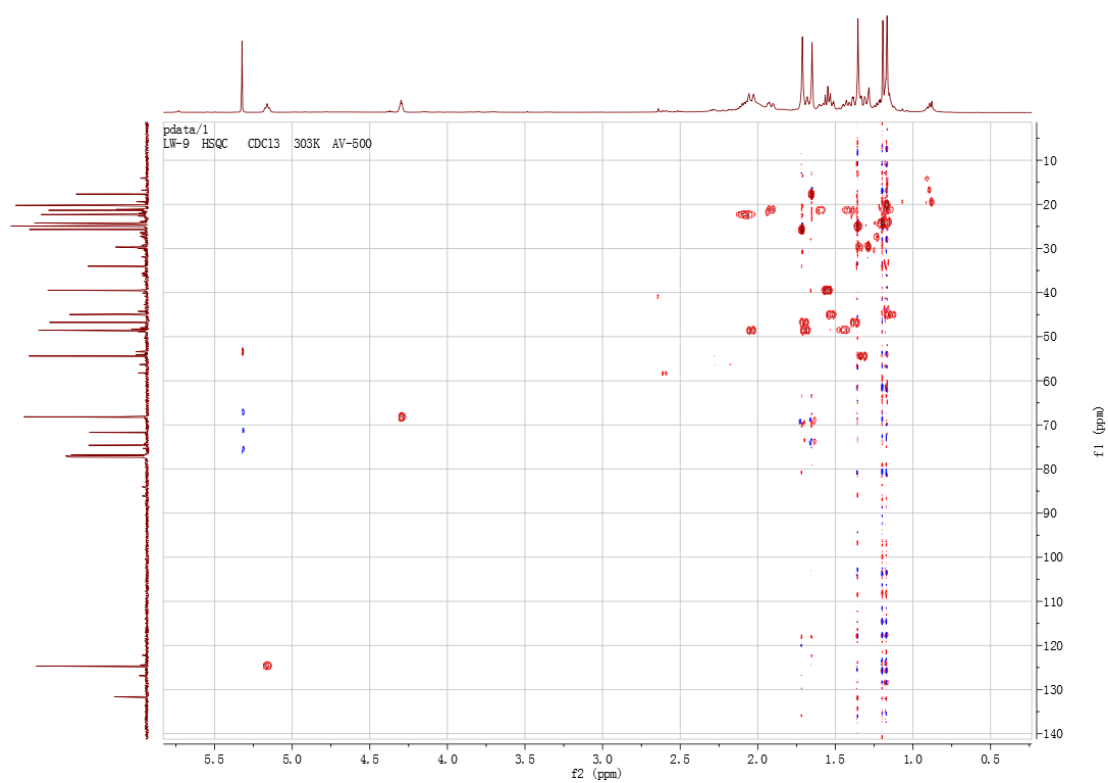

**Figure S18.** HSQC spectrum (500 MHz,  $\text{CDCl}_3$ ) of compound **2**.

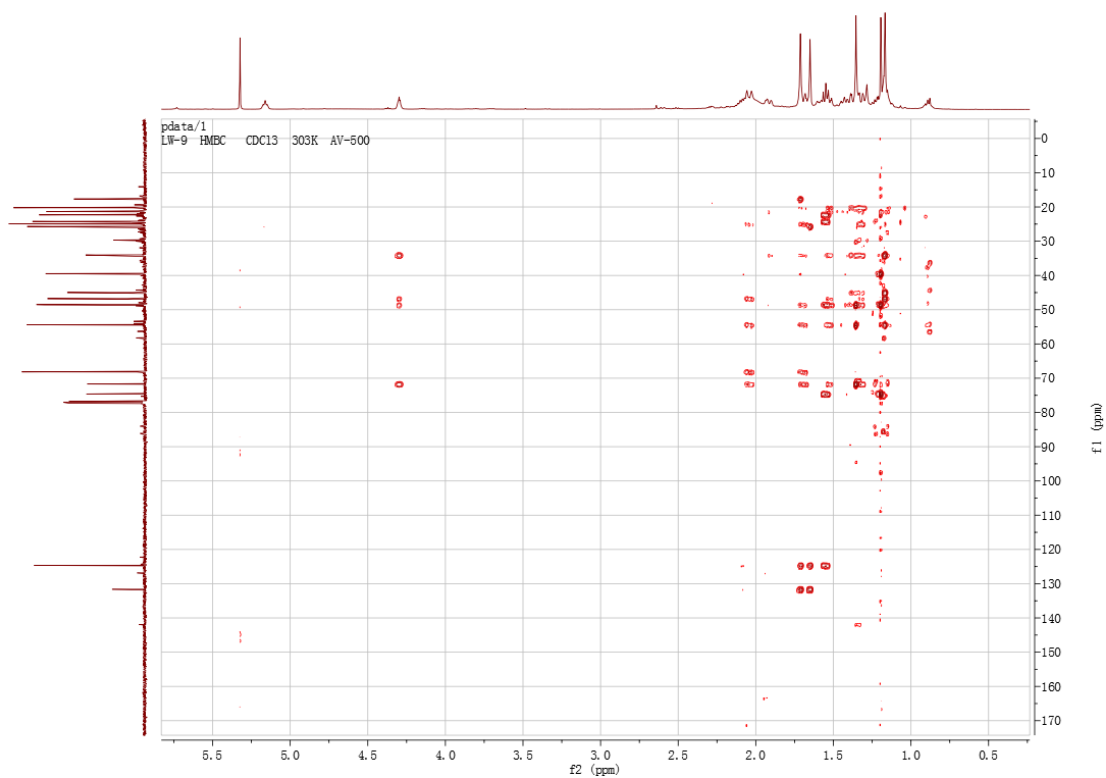

**Figure S19.** HMBC spectrum (500 MHz, CDCl<sub>3</sub>) of compound 2.

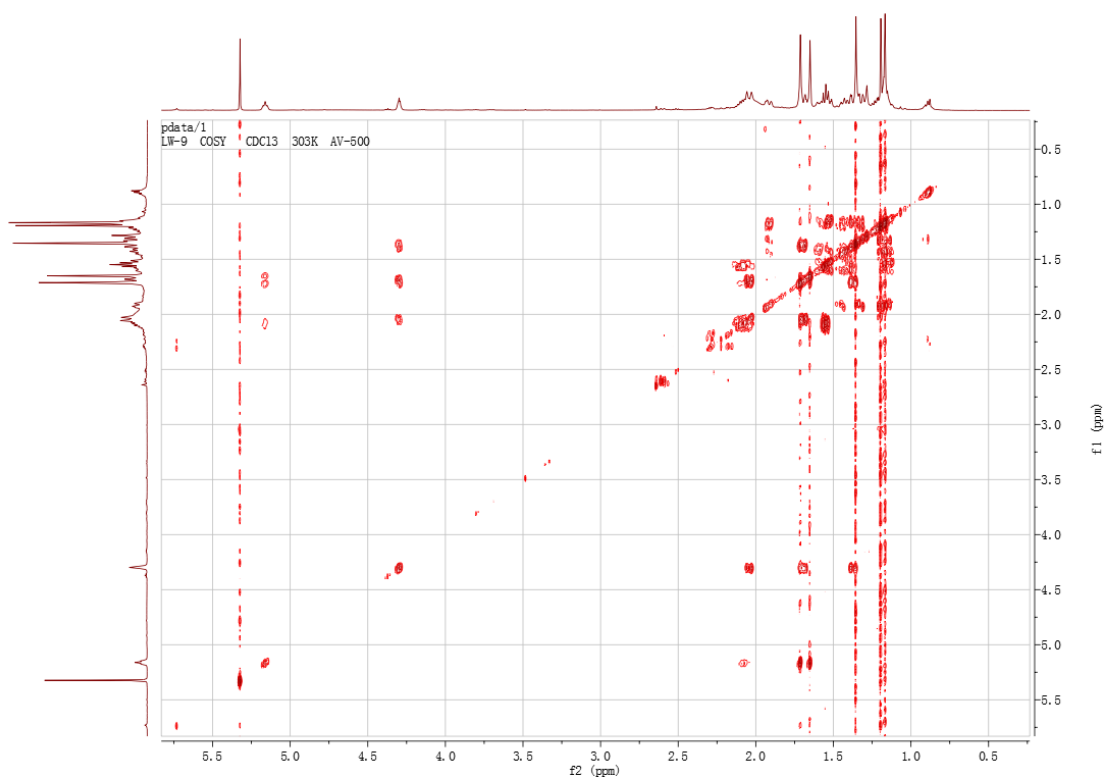

**Figure S20.**  $^1\text{H}$ - $^1\text{H}$  COSY spectrum (500 MHz, CDCl<sub>3</sub>) of compound 2.

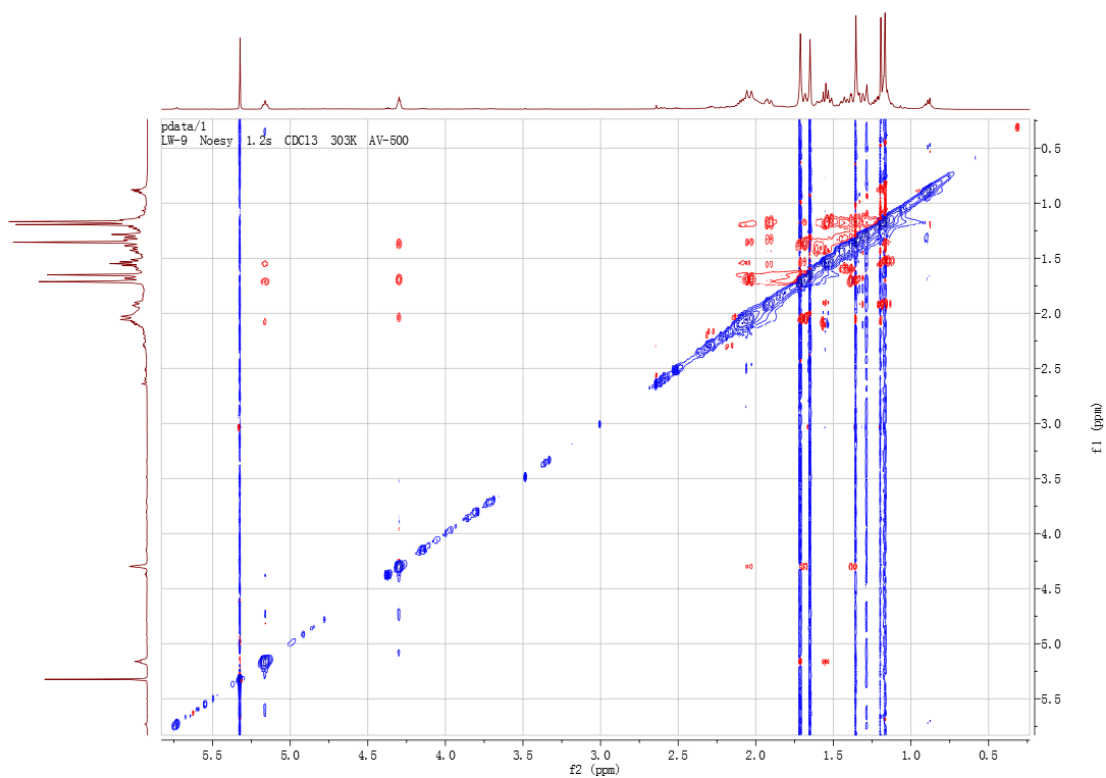

**Figure S21.** ROESY spectrum (500 MHz,  $\text{CDCl}_3$ ) of compound **2**.

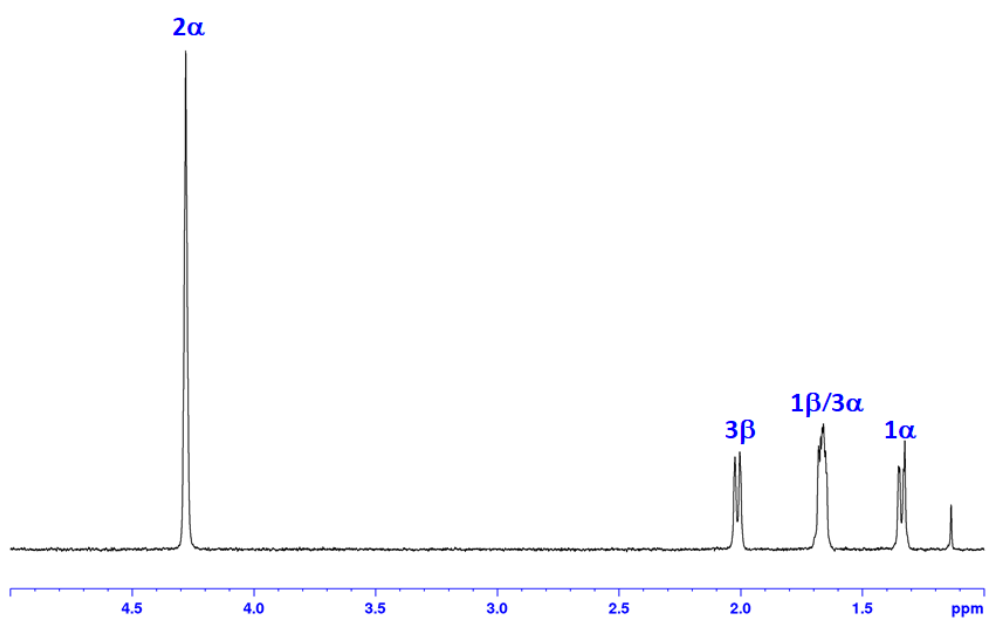

**Figure S22.** SELTOCSY spectrum (500 MHz, transmitter frequency at 4.28 ppm, 10 Hz width, 120 ms mix time,  $\text{CDCl}_3$ ) of compound **2**.

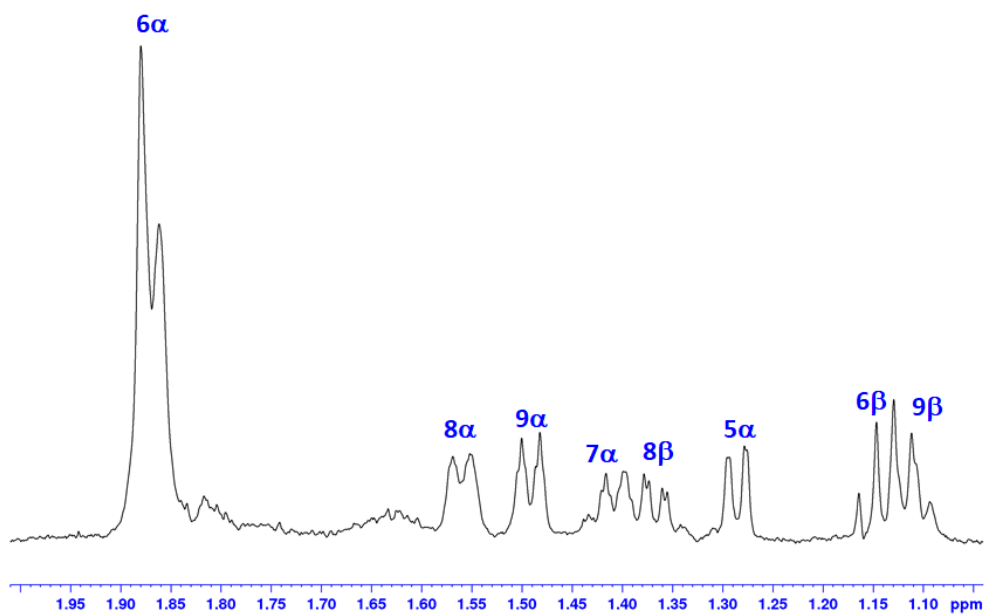

**Figure S23.** SELTOCSY spectrum (500 MHz, transmitter frequency at 1.88 ppm, 10 Hz width, 120 ms mix time, CDCl<sub>3</sub>) of compound **2**.

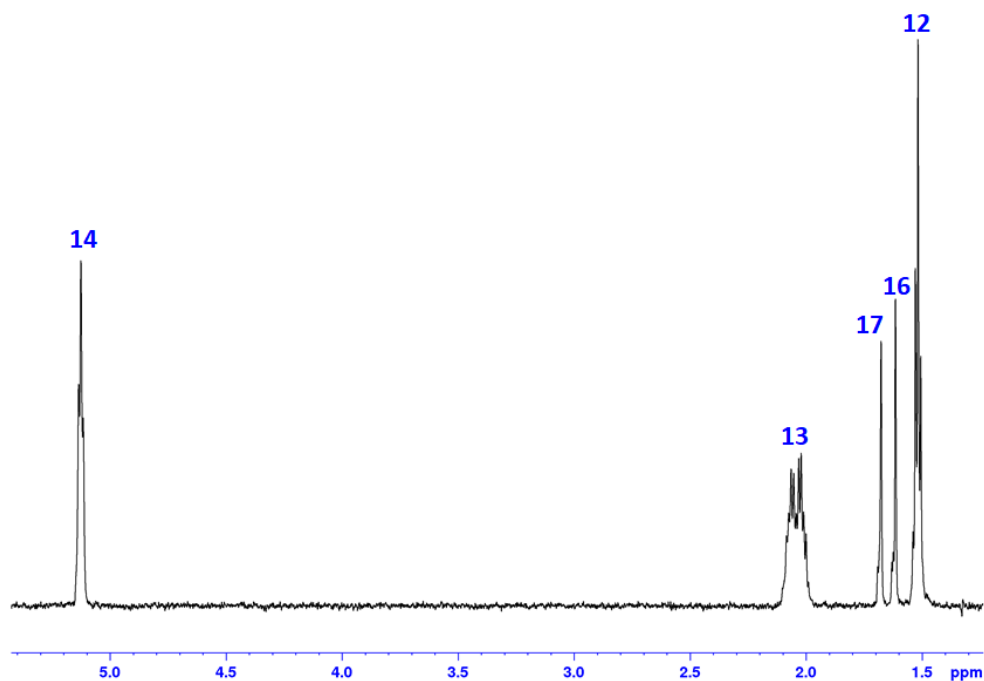

**Figure S24.** SELTOCSY spectrum (500 MHz, transmitter frequency at 5.13 ppm, 10 Hz width, 120 ms mix time, CDCl<sub>3</sub>) of compound **2**.

### Qualitative Analysis Report

Data Filename: LH-4215-LMR-10.d      Sample Name: LH-4215  
Sample Type: Sample      Position: P2-D2  
Instrument Name: Instrument 1      User Name:  
Acq Method: LH LML.m      Acquired Time: 4/14/2018 9:45:06 AM  
IRM Calibration Status: Success      DA Method: YINWIN.m  
Comment:

Sample Group      Info.

#### User Spectra

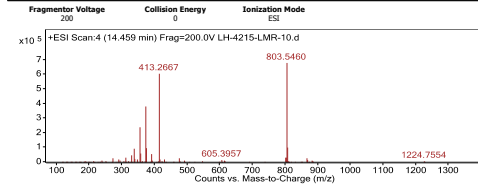

| m/z      | z | Abund     |
|----------|---|-----------|
| 337.2523 | 1 | 91990.57  |
| 355.2631 | 1 | 239436.2  |
| 356.2673 | 1 | 60103.9   |
| 373.2745 | 1 | 580411.75 |
| 374.2769 | 1 | 65781.25  |
| 413.2667 | 1 | 506927.63 |
| 414.2702 | 1 | 140741.06 |
| 603.546  | 1 | 679692.56 |
| 604.5512 | 1 | 347174.38 |
| 605.5525 | 1 | 101199.11 |

Figure S25.

HR-ESI-MS spectrum of compound 3.

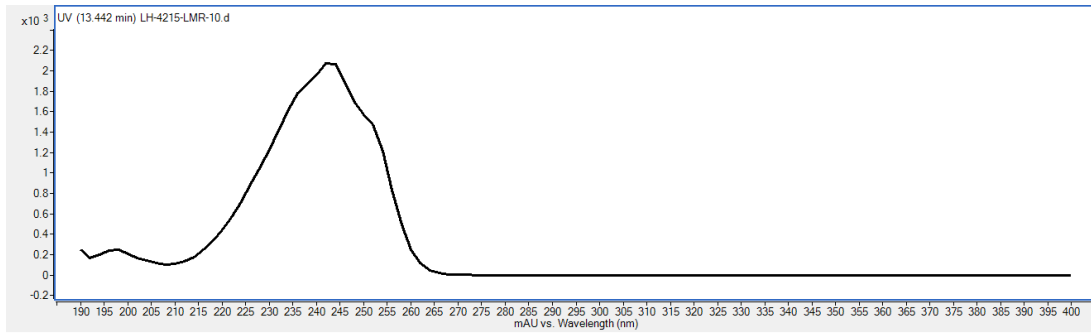

Figure S26.

UV spectrum of compound 3.







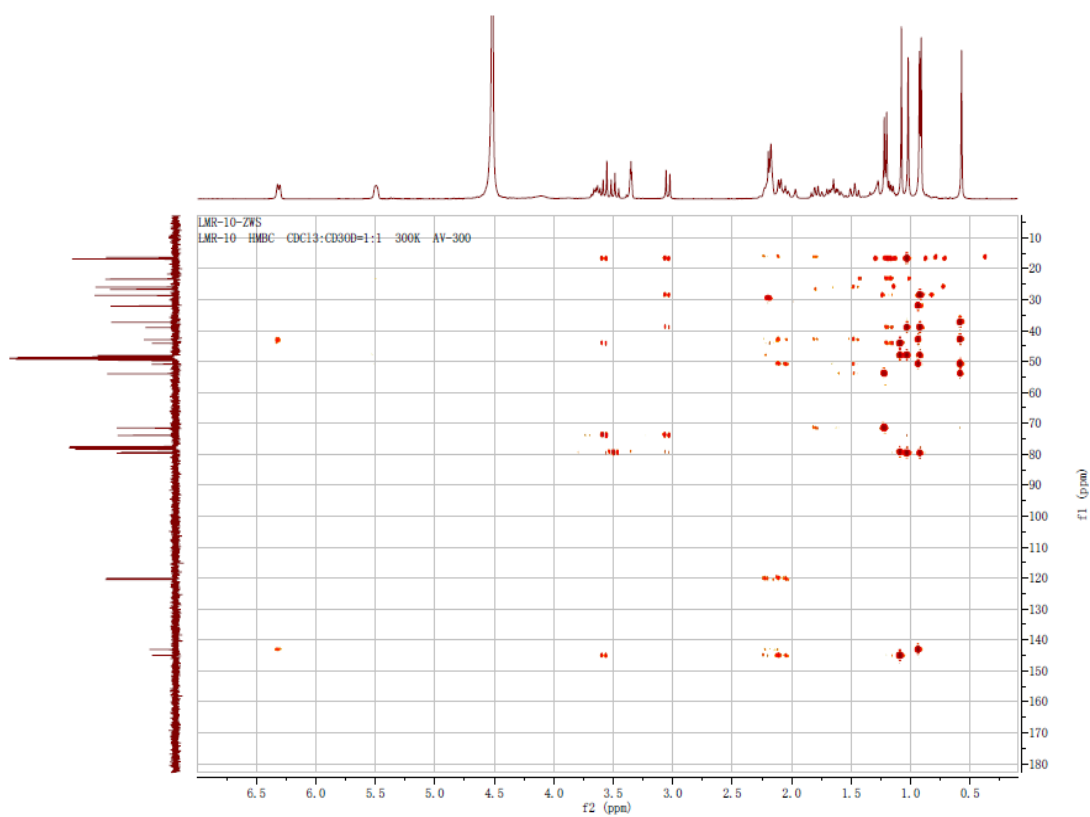

**Figure S31.** HMBC spectrum (500 MHz, CDCl<sub>3</sub>:CD<sub>3</sub>OD=1:1) of compound **3**.

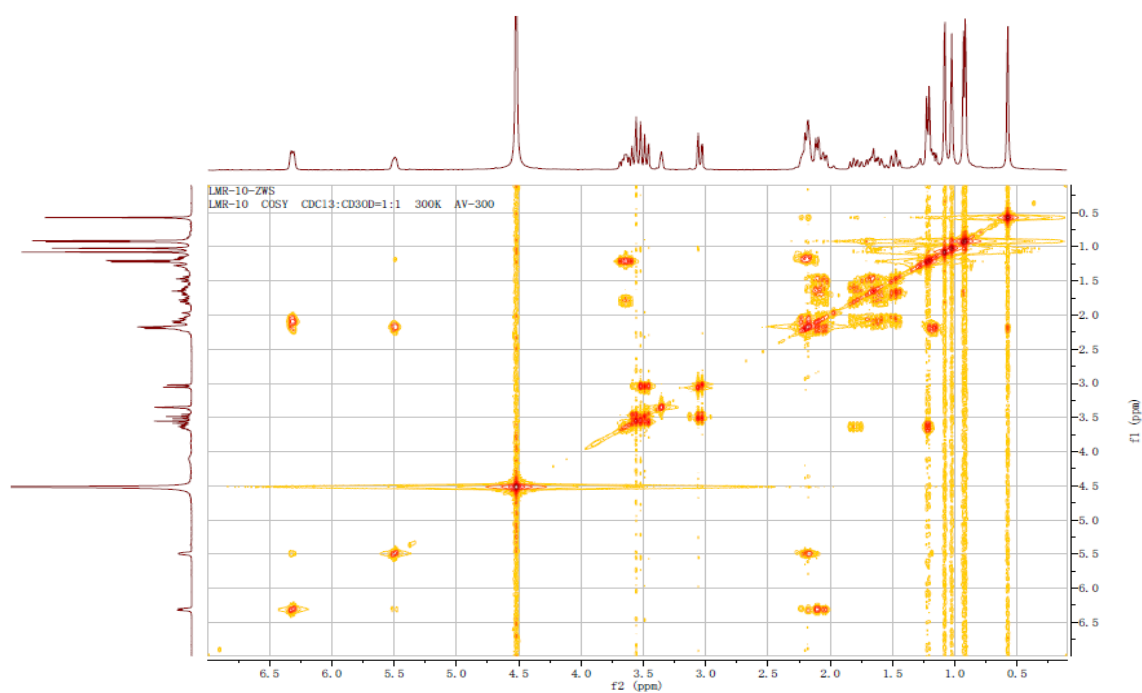

**Figure S32.** <sup>1</sup>H-<sup>1</sup>H COSY spectrum (500 MHz, CDCl<sub>3</sub>:CD<sub>3</sub>OD=1:1) of compound **3**.

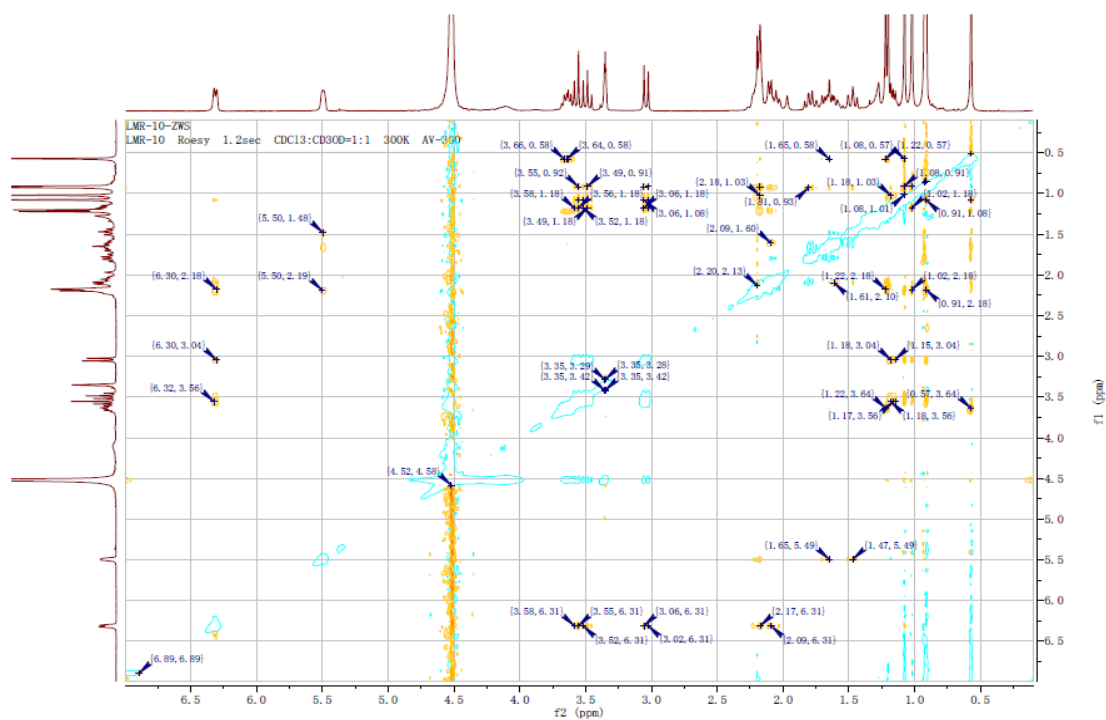

**Figure S33.** ROESY spectrum (500 MHz,  $\text{CDCl}_3:\text{CD}_3\text{OD}=1:1$ ) of compound **3**.

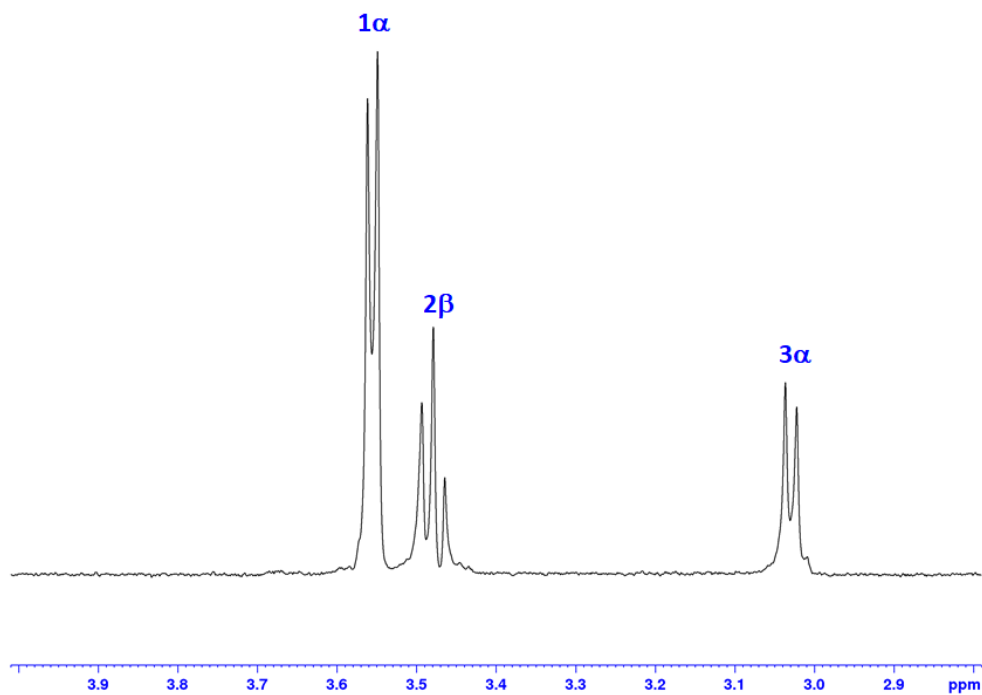

**Figure S34.** SELTOCSY spectrum (500 MHz, transmitter frequency at 3.57 ppm, 10 Hz width, 120 ms mix time,  $\text{CDCl}_3$ ) of compound **3**.

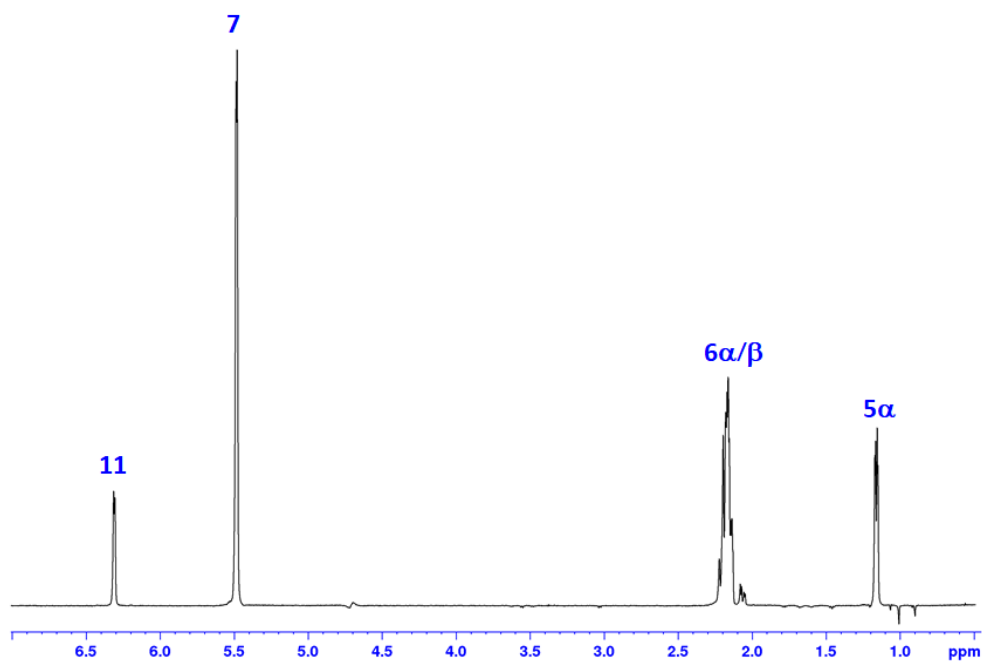

**Figure S35.** SELTOCSY spectrum (500 MHz, transmitter frequency at 5.49 ppm, 10 Hz width, 120 ms mix time,  $\text{CDCl}_3$ ) of compound **3**.

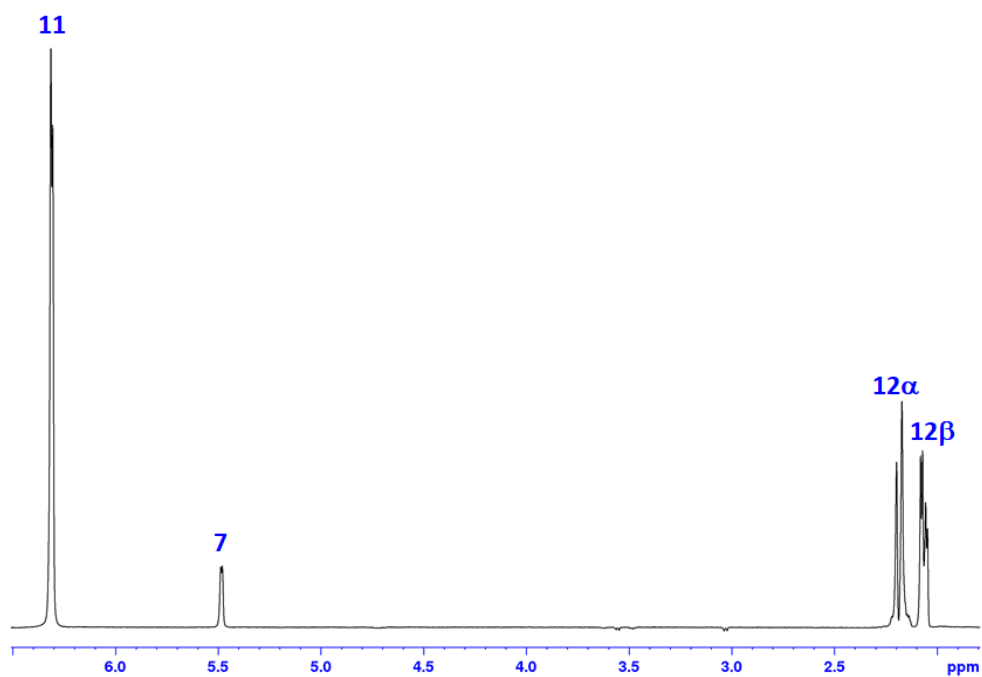

**Figure S36.** SELTOCSY spectrum (500 MHz, transmitter frequency at 6.31 ppm, 10 Hz width, 120 ms mix time,  $\text{CDCl}_3$ ) of compound **3**.

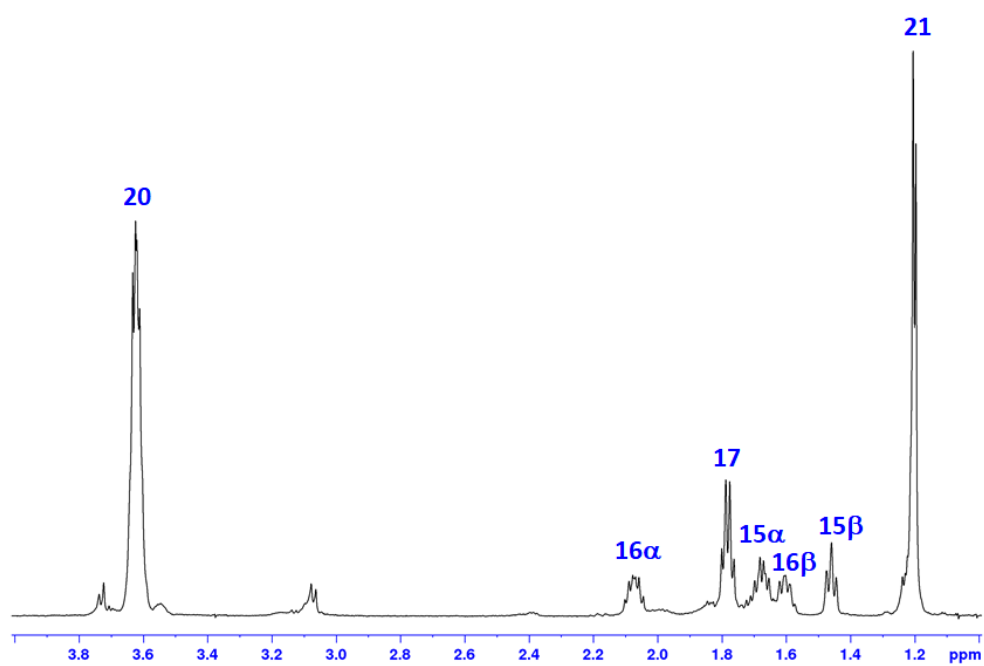

**Figure S37.** SELTOCSY spectrum (500 MHz, transmitter frequency at 3.62 ppm, 10 Hz width, 120 ms mix time,  $\text{CDCl}_3$ ) of compound **3**.
